# Supplementary material
Source: PubMed Central journal article supplement (PMC4505238)
Supplement: AAC.00501-15_zac008154169so1.pdf [file AAC.00501-15_zac008154169so1.pdf]

**Table S1.** Primers used for detecting pHNAH4-1 and pHNAH46-1 markers

| Primer                           | Nucleotide sequence (5'→3') | Target                              | Position in pHNAH46-1 | Position in pHNAH4-1 | Reference  |
|----------------------------------|-----------------------------|-------------------------------------|-----------------------|----------------------|------------|
| <i>bla</i> <sub>CTX-M-1</sub> -F | CTTCCAGAATAAGGAATCCC        | <i>bla</i> <sub>CTX-M-1</sub> group |                       |                      | 1          |
| <i>bla</i> <sub>CTX-M-1</sub> -R | CGTCTAAGGCGATAAACAAA        | <i>bla</i> <sub>CTX-M-1</sub> group |                       |                      | 1          |
| ISEcp1-F                         | CTATCCGTACAAGGGAGTGT        | ISEcp1                              |                       |                      | 2          |
| M1-R                             | CCATTGCCCGAGGTGAAG          | <i>bla</i> <sub>CTX-M-1</sub> group |                       |                      | 2          |
| RepA-F                           | CTGTCCGGCATGTCTGTCTC        | <i>repA</i>                         | 923-941               |                      | 3          |
| RepA-R                           | CTGGCTACCAGTTGCTCTAA        | <i>repA</i>                         | 1475-1456             |                      | 3          |
| finO-F                           | CCCGTGATTGTGGTCAAA          | <i>finO</i>                         | 3280-3297             |                      | 3          |
| finO-R                           | GGGTTATCCGCCAGGTAT          | <i>finO</i>                         | 3614-3597             |                      | 3          |
| nikB-F                           | ATCCAACCTACAGACGCCTTAC      | <i>nikB</i>                         | 20232-20253           |                      | 3          |
| nikB-R                           | CTGCGACCTGTGCTTGCT          | <i>nikB</i>                         | 21167-21150           |                      | 3          |
| rci-F                            | TGCCCGTTTCTGTTCTCG          | <i>rci</i>                          | 30212-30229           |                      | 3          |
| rci-R                            | TGCCCTGTTGTCATCATTATTC      | <i>rci</i>                          | 30886-30865           |                      | 3          |
| pilQ-F                           | CGTTGGCGTGTAAGGTCG          | <i>pilQ</i>                         | 36771-36788           |                      | 3          |
| pilQ-R                           | CCTGGCGAAAGCAAACAA          | <i>pilQ</i>                         | 37528-37511           |                      | 3          |
| ISEcp-F                          | TATTGTAGCATCGGTTTCC         | <i>tnpA</i> of ISEcp1               | 10272-10290           | 24773-24755          | 3          |
| HP2-R                            | TGTTGTCCCGTATCCTTAT         | Incl2 backbone                      | 11593-11575           |                      | 3          |
| CHP1-F                           | GCTAAATGCTTCGCAGGAG         | Incl2 backbone                      | 7095-7113             | 27950-27932          | This study |
| Orf477-R                         | ATTCAGCACCACGAAACGA         | <i>orf477</i> Δ                     | 8054-8036             | 26991-27009          | This study |
| AH4-F1                           | AAACCACGCCATCCTCTG          | Incl1 backbone                      |                       | 5000-5017            | This study |
| AH4-R1                           | GGCTGGGAGCACATCAAC          | Tn1721(MRR1)                        |                       | 5482-5465            | This study |
| AH4-F2                           | TTACCATCGGTTATCCCTT         | Tn1721 (MRR1)                       |                       | 13779-13797          | This study |
| AH4-R2                           | GTTTCCTCATCTTCGTGCT         | Incl1 backbone                      |                       | 14626-14608          | This study |
| AH4-F3                           | GTAAAGAGGCGGTATTCAA         | Incl1 backbone                      |                       | 23322-23340          | This study |
| AH4-R3                           | GCATTCTCAAGGAGCAGA          | ISEcp1                              |                       | 24366-24349          | This study |
| AH4I1-F1                         | TCATCACTGCCCTTACCG          | Incl1 backbone                      |                       | 30342-30325          | This study |
| AH4I2-R1                         | CCCATCATTACTACTAAACCC       | Incl2 fragment                      |                       | 29163-29183          | This study |
| AH4-F6                           | GGCGGTCACATCCTTC            | Incl1 backbone                      |                       | 41912-41930          | This study |
| AH4-R6                           | CAGCTAAACCCGGTAATCC         | class II intron                     |                       | 42794-42776          | This study |
| Rci1-F <sup>a</sup>              | TATCAACGGTTGTTATTTCG        | Incl1 <i>rci</i>                    |                       | 91716-91735          | This study |
| pilV1-R <sup>a</sup>             | GCACAGGAGGATTTGTCTT         | Incl1 <i>pilU</i>                   |                       | 94749-94731          | This study |
| Rci2-F                           | CAGGGCAAGTTCAAGACG          | Incl2 <i>rci</i>                    | 30880-30897           |                      | This study |
| pilV2-R                          | CAGCGTGAATAATAAAGGGAT       | Incl2 <i>pilV</i>                   | 32529-32509           |                      | This study |

<sup>a</sup>Selected PCR products were cloned in pMD19T and sequenced.

1. Liu JH, Wei SY, Ma JY, Zeng ZL, Lu DH, Yang GX, Chen ZL. 2007. Detection and characterisation of CTX-M and CMY-2 β-lactamases among *Escherichia coli* isolates from farm animals in Guangdong Province of China. *Int. J. Antimicrob. Agents* **29**:576-581.
2. Sun Y, Zeng Z, Chen S, Ma J, He L, Liu Y, Deng Y, Lei T, Zhao J, Liu JH. 2010. High prevalence of *bla*<sub>CTX-M</sub> extended-spectrum β-lactamase genes in *Escherichia coli* isolates from pets and emergence of CTX-M-64 in China. *Clin Microbiol Infect* **16**:1475-1481.
3. Lv L, Partridge SR, He L, Zeng Z, He D, Ye J, Liu JH. 2013. Genetic characterization of Incl2 plasmids carrying *bla*<sub>CTX-M-55</sub> spreading in both pets and food animals in China. *Antimicrob Agents Chemother.* **57**:2824-2827.

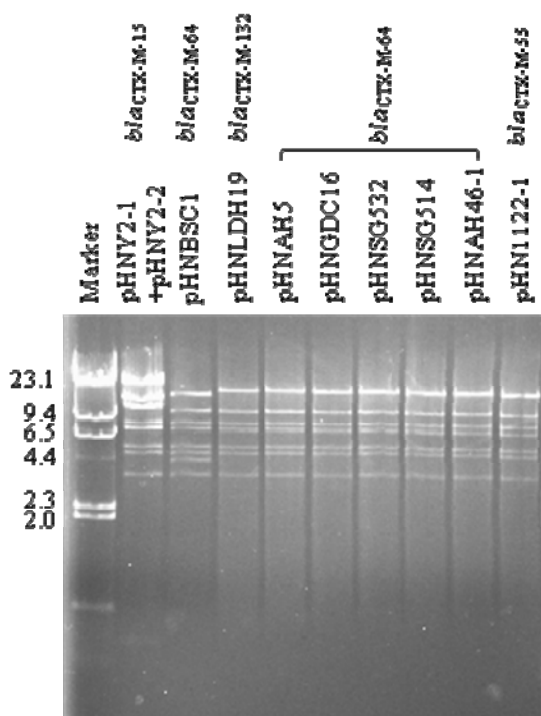

**FIG S1.** ApaLI restriction digestion profiles of IncI2 plasmids listed in Table 1. Transconjugants with pHNY2-1 also carry pHNY2-2 (IncN), as indicated. pHNBS C1 pHNAH5, pHNGDC16, pHN S G532, and pHN S G514 were from BSC1, AHC5, GDC16, SG0532-2, and SG0514-2 (Table 1), respectively. Marker,  $\lambda$ HindIII marker (TaKaRa Biotechnology, Dalian, China), with sizes shown in kb.

**Table S2.** Sequence differences between backbones of IncI2 plasmids carrying different *bla*<sub>CTX-M</sub> genes (not including shufflons).

| Plasmid                          | <b>pHNY2-1<sup>a</sup></b>          | <b>pHN1122-1<sup>a</sup></b>   | p1081-CTXM                     | pSTH21                         | <b>pHNAH46-1<sup>a</sup></b>   | pCTXM64_C0967                  | <b>pHNLDH19<sup>a</sup></b>     | pCTXM132_P0421                  |
|----------------------------------|-------------------------------------|--------------------------------|--------------------------------|--------------------------------|--------------------------------|--------------------------------|---------------------------------|---------------------------------|
| GenBank accession no.            | KF601686.2                          | JN797501.1                     | KJ460501.1                     | LN623683.2                     | KJ020576.1                     | KP091735.1                     | KM207012.2                      | KP198615.1                      |
| <i>bla</i> <sub>CTX-M</sub> gene | <i>bla</i> <sub>CTX-M-15</sub>      | <i>bla</i> <sub>CTX-M-55</sub> | <i>bla</i> <sub>CTX-M-55</sub> | <i>bla</i> <sub>CTX-M-55</sub> | <i>bla</i> <sub>CTX-M-64</sub> | <i>bla</i> <sub>CTX-M-64</sub> | <i>bla</i> <sub>CTX-M-132</sub> | <i>bla</i> <sub>CTX-M-132</sub> |
| Method                           | 454                                 | 454                            | Illumina                       | ?                              | 454                            | IonTorrent                     | 454                             | IonTorrent                      |
| Position <sup>b</sup>            | Gene/feature <sup>c</sup>           |                                |                                |                                |                                |                                |                                 |                                 |
| 4970-4975                        | <i>yafB-dnaJ</i>                    | 6xT                            | <b>5xT</b>                     | 6xT                            | 6xT                            | 6xT                            | 6xT                             | 6xT                             |
| 5023                             | <i>yafB-dnaJ</i>                    | T                              | T                              | T                              | <b>A</b>                       | T                              | T                               | T                               |
| 6323                             | <i>dnaJ</i>                         | G                              | -                              | G                              | G                              | G                              | G                               | G                               |
| 6863                             | hp                                  | G                              | G                              | G                              | G                              | <b>A</b>                       | G                               | G                               |
| 7941                             | <i>yajA-bla</i> <sub>CTX-M-64</sub> | C                              | C                              | C                              | <b>T</b>                       | C                              | C                               | C                               |
| 9461-4                           | <i>ISEcpI</i>                       | 1xAACA                         | <b>2xAACA</b>                  | 1xAACA                         | 1xAACA                         | 1xAACA                         | 1xAACA                          | 1xAACA                          |
| 11399-11400                      | <i>dnaJ</i> -hp                     | AG                             | AG                             | AG                             | AG                             | <b>CT</b>                      | <b>CT</b>                       | AG                              |
| 13847-13853                      | <i>ycfA</i>                         | 7xA                            | 7xA                            | 7xA                            | 7xA                            | 7xA                            | 7xA                             | <b>6xA</b>                      |
| 15466                            | hp                                  | G                              | G                              | G                              | G                              | <b>A</b>                       | G                               | G                               |
| 15636                            | hp                                  | C                              | C                              | C                              | C                              | <b>T</b>                       | C                               | C                               |
| 15987                            | hp                                  | C                              | C                              | C                              | C                              | C                              | C                               | <b>A</b>                        |
| 17474                            | <i>traL</i>                         | G                              | G                              | <b>A</b>                       | G                              | G                              | G                               | G                               |
| 18234                            | <i>hp-nikA</i>                      | <b>A</b>                       | C                              | C                              | C                              | C                              | C                               | C                               |
| 19771                            | <i>nikC</i>                         | A                              | A                              | A                              | <b>G</b>                       | A                              | A                               | A                               |
| 21100-21135                      | <i>nikB</i>                         | 2x18 bp                        | 2x18 bp                        | 2x18 bp                        | <b>3x18 bp</b>                 | 2x18 bp                        | 2x18 bp                         | 2x18 bp                         |
| 22857                            | <i>nikB</i> -hp                     | A                              | A                              | A                              | A                              | <b>G</b>                       | A                               | A                               |
| 23774-23778                      | hp                                  | <b>2xTGATA</b>                 | 1xTGATA                        | 1xTGATA                        | 1xTGATA                        | 1xTGATA                        | 1xTGATA                         | 1xTGATA                         |
| 31146-31149                      | <i>rci</i> -shufflon                | 4xC                            | 4xC                            | 4xC                            | 4xC                            | 4xC                            | 4xC                             | <b>3xC</b>                      |
| 37605                            | <i>pilQ</i>                         | A                              | A                              | A                              | A                              | A                              | <b>G</b>                        | <b>G</b>                        |
| 41180                            | <i>pilN</i>                         | G                              | G                              | G                              | <b>A</b>                       | G                              | G                               | G                               |
| 43826-43833                      | <i>traK</i>                         | 8xT                            | 8xT                            | 8xT                            | 8xT                            | 8xT                            | 8xT                             | <b>7xT</b>                      |
| 46177                            | <i>traH</i>                         | C                              | <b>T</b>                       | C                              | C                              | C                              | C                               | C                               |
| 55521                            | <i>ygiA</i>                         | G                              | G                              | G                              | G                              | G                              | <b>T</b>                        | G                               |
| 58291-58292                      | hp                                  | 2xT                            | 2xT                            | 2xT                            | 2xT                            | 2xT                            | 2xT                             | <b>possibly 3xT<sup>d</sup></b> |
| 60400-60472                      | <i>yhdA</i>                         | 73 bp                          | 73 bp                          | 73 bp                          | <b>missing</b>                 | 73 bp                          | 73 bp                           | 73 bp                           |

<sup>a</sup>Differences in the plasmids that were sequenced in this study (names in bold) have been checked and confirmed.

<sup>b</sup>Position in pHNAH46-1, selected as an example with no insertions or deletions relative to other plasmids.

<sup>c</sup>Two gene/feature names separated by a dash indicates that the change is in an intergenic region; hp, hypothetical protein.

<sup>d</sup>in 727 bp region duplicated in pCTXM132\_P0421 only.
